# Supplementary material for: Absolute isotope ratios of carbon dioxide – a feasibility study
Source: Royal Society of Chemistry journal article supplement (doi:10.1039/d0ja00318b), 2020-01-01
Supplement: d0ja00318b1.pdf [file d0ja00318b1.pdf]

## Absolute Isotope Ratios of Carbon Dioxide – A Feasibility Study – Electronic Supplementary Information (ESI)

Lukas Flierl<sup>\*a</sup>, Olaf Rienitz<sup>a</sup>, Paul J. Brewer<sup>b</sup>, Harro A. J. Meijer<sup>c</sup>, Farilde M. Steur<sup>c</sup>

### 1 Gravimetric Mixture

This section is a brief summary of the gravimetric mixture approach, we discuss a generic system of  $N_{\text{is}}$  isotopes. In the case of a system of  $N_{\text{iso}}$  isotopes,  $N_{\text{iso}}$  starting materials – each enriched in one different of the  $N_{\text{iso}}$  isotopes – are needed. For a system with  $N_{\text{iso}}$  different isotopes, there are  $(N_{\text{iso}}-1)$  isotope ratios  $R_{i/1}$ , where 1 is the reference isotope, and therefore, there are also  $(N_{\text{iso}}-1)$   $K$ -factors. In the case of an isotopologue system like carbon dioxide, the starting materials must be enriched in one of the isotopologues. With  $N_{\text{iso}}$  starting materials, there are in total  $(n_{\text{iso}} \times (n_{\text{iso}} - 1))/2$  different binary blends prepared from the starting materials, see figure 1, where all possible combinations are shown for carbon dioxide having twelve isotopologues (not considering the unstable isotopes). The starting materials are represented as squares, and the blends are represented as circles. The bars in the circles and squares indicate the amount-of-substance fraction of each isotopologue. The preparation of the binary mixtures is done under gravimetric control and in such a way that the resulting ratio of the two major isotopes/isotopologues is close to unity. For example, if material A is enriched in the first isotope and material B is enriched in the second isotope, the resulting blend AB should have a ratio  $R_{2/1}$  close to 1. It has been shown that the ratios of the two major isotopes in the binary blends (AB to AX) can be expressed as linear combinations of the corresponding ratios of the two parent materials<sup>1</sup>. By setting up this kind of equation for at least  $(n_{\text{iso}} - 1)$  binary mixtures, a system of linear equations is obtained. By taking into account the relation between the absolute isotope ratios  $R$  and measured ion intensity ratios  $R^{\text{m}}$ , see equation 1, the  $(n_{\text{iso}} - 1)$   $K$ -factors are introduced into this system of linear equations. This system can be solved for the wanted  $K$ -factors for any number of isotopes in a non-iterative way by using the so-called Gaussian elimination<sup>2</sup>, and also the uncertainty associated with the  $K$ -factors can be calculated by solving the system several thousand times during a Monte Carlo simulation<sup>3</sup>. A generic expression of such equations is given in equation 2. The quantities appearing in equation 2 are as follows:  $K_j$  correcting the  $j^{\text{th}}$  intensity ratio,  $M_j$  being the molar mass of the  $j^{\text{th}}$  species,  $R_{A,i}^{\text{m}}$  being the  $i^{\text{th}}$  measured intensity ratio in material A,  $R_{Y,i}^{\text{m}}$  being analogously defined,  $R_{AY,i}^{\text{m}}$  being the  $i^{\text{th}}$  measured intensity ratio in blend AY,  $m_{AY}$  being the mass of material A used to prepare AY and finally  $m_{YA}$  is the mass of material Y used for preparing blend AY. It has also been shown that it is not necessary to prepare all possible binary blends and that there is, in terms of the lowest achievable uncertainty associated with the  $K$ -factors, a best choice of blends and measured ratios. The lowest uncertainty can be achieved by using all the blends that contain material A, which has a very high amount-of-substance fraction of the most abundant isotope (higher than its natural abundance). In the case of carbon dioxide,  $x(^{12}\text{C}^{16}\text{O}_2)$  of material A would be very high and blends AB to AG must be prepared, see figure S 1, if we consider the ideal case where all the twelve isotopologues can be resolved and detected and starting materials A to G exist.

$$R_{i/1} = \frac{n_i}{n_1} = K_{i/1} \times R_{i/1}^{\text{m}} = K_{i/1} \times \frac{I_i}{I_1} \quad (1)$$

$$0 = \sum_{j=1}^{N_{\text{iso}}} \left[ K_j \times M_j \times \left( \frac{R_{A,i}^{\text{m}}}{m_{AY} \times (R_{AY,j}^{\text{m}} - R_{A,j}^{\text{m}})} - \frac{R_{Y,i}^{\text{m}}}{m_{YA} \times (R_{Y,j}^{\text{m}} - R_{AY,j}^{\text{m}})} \right) \right] \quad (2)$$

<sup>a</sup> Physikalisch-Technische Bundesanstalt (PTB), Bundesallee 100, 38116 Braunschweig, Germany. Fax: +49 531 592 310; Tel: +49 531 592 3319; E-mail: lukas.flierl@ptb.de

<sup>b</sup> National Physical Laboratory, Analytical Science Division, Hampton Road, Teddington, Middlesex TW11 0LW, U.K.

<sup>c</sup> Centre for Isotope Research (CIO), Energy and Sustainability Institute Groningen (ESRIG), University of Groningen, 9747 AG, Groningen, the Netherlands

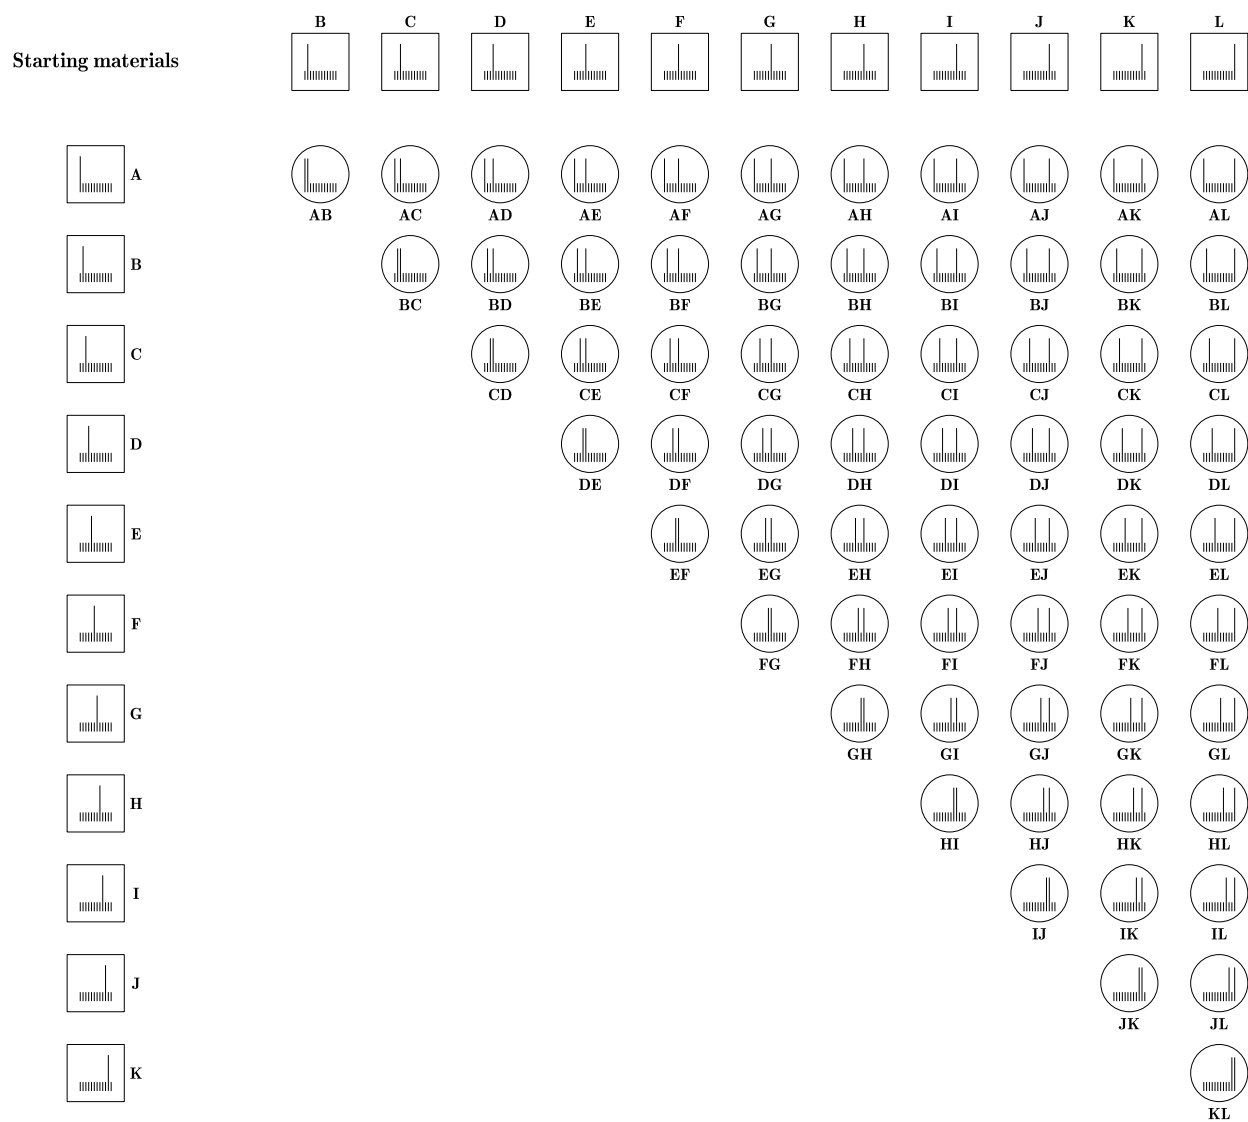

**Fig. S 1** All 66 different binary mixtures that can be prepared from the twelve different starting materials A to K. The starting materials are represented as squares, and blends are represented as circles. The amount-of-substance fraction of each isotopologue is indicated with the bars in the squares and the circles, respectively.

## 2 Calculating $R_{47}^m$

$R_{47}^m$  was derived from the isotope ratios  $R_{13}$ ,  $R_{17}$  and  $R_{18}$ , according to equation 3.

$$R_{47}^m = 2 \times R_{18} \times R_{17} + 2 \times R_{18} \times R_{13} + R_{17} \times R_{13}^2 \quad (3)$$

The isotope ratios were derived by solving equation 4, the so-called Santrock algorithm<sup>4</sup>. For  $\lambda$  and  $K$ , the values recommended by Brand<sup>5</sup> ( $\lambda = 0.528$ ,  $K = 0.01022461$ ) were chosen. It should be pointed out that  $K$  is not a  $K$ -factor and should not be confused with them, but we did not change its symbol as it is well established in the literature.  $K$  is defined as  $K = R_{17,VPDB}/R_{18,VPDB}^\lambda$  and, therefore, describes the oxygen isotope composition of VPDB-CO<sub>2</sub>. Since  $\lambda \neq 0.5$ , equation 4 cannot be solved for  $R_{18}$  analytically and must be solved iteratively. In the ESI, we present a code which calculates the isotope ratios and their associated uncertainties. To solve equation 4, the so-called *regula falsi*<sup>6</sup> is implemented.

$$0 = -3 \times K^2 \times R_{18}^{2 \times \lambda} + 2 \times K \times R_{45}^m \times R_{18}^\lambda + 2 \times R_{18} - R_{46}^m \quad (4)$$

For the calculation of the uncertainties associated with the isotope ratios, we made the following considerations. The standard uncertainty associated with  $R_{46}^m$  can be calculated according to the guide titled 'Evaluation of measurement data - Guide to the expression of uncertainty in measurement' (GUM)<sup>7</sup> as shown in equation 5. Since  $u_c^2(R_{45}^m)$  and  $u_c^2(R_{46}^m)$  are known from the extrapolation, this equation can be solved for the known  $u_c^2(R_{18})$ . The needed partial derivatives occurring in equation 5 are given in equations 6a and 6b.

$$u_c^2(R_{46}^m) = \left( \frac{\partial R_{46}^m}{\partial R_{45}^m} \right)^2 \times u_c^2(R_{45}^m) + \left( \frac{\partial R_{46}^m}{\partial R_{18}} \right)^2 \times u_c^2(R_{18}) \quad (5)$$

$$\frac{\partial R_{46}^m}{\partial R_{18}} = 2 \times K \times R_{18}^{(\lambda-1)} \times R_{45}^m \times \lambda - 6 \times K^2 \times R_{18}^{(2 \times \lambda - 1)} \times \lambda + 2 \quad (6a)$$

$$\frac{\partial R_{46}^m}{\partial R_{45}^m} = 2 \times K \times R_{18}^\lambda \quad (6b)$$

Inserting these partial derivatives and solving for  $u_c(R_{18})$  obtains:

$$u_c(R_{18}) = \sqrt{\frac{u_c^2(R_{46}^m) - (2 \times K \times R_{18}^\lambda)^2 \times u_c^2(R_{45}^m)}{\left( \left( 2 \times K \times R_{18}^{(\lambda-1)} \times R_{45}^m - 6 \times K^2 \times R_{18}^{(2 \times \lambda - 1)} \right) \times \lambda + 2 \right)^2}} \quad (7)$$

Since  $R_{18}$  has been determined iteratively, the found value of  $R_{18}$  may differ from the true value, due to machine precision and rounding errors. In order to take this difference into account within the uncertainty budget, the found value of  $R_{18}$  is inserted into equation 4, and the deviation from zero ( $\varepsilon$ ) is calculated. This deviation from zero is another uncertainty source and can be considered by equation 8.

$$u_{\text{total}}(R_{18}) = \sqrt{u_c^2(R_{18}) + \varepsilon^2} \quad (8)$$

After calculating  $R_{18}$  and  $u_{\text{total}}(R_{18})$ , also  $R_{13}$ ,  $R_{17}$  and their associated uncertainties can be calculated using the following equations.

$$R_{17} = K \times R_{18}^\lambda \quad (9a)$$

$$u_c(R_{17}) = K \times \lambda \times R_{18}^{\lambda-1} \times u_{\text{total}}(R_{18}) \quad (9b)$$

$$R_{13} = R_{45}^m - 2 \times R_{17} \quad (10a)$$

$$u_c(R_{13}) = \sqrt{u_c^2(R_{45}^m) + 4 \times u_c^2(R_{17})} \quad (10b)$$

Combining all the given equations, the uncertainty associated with  $R_{47}$  can finally be calculated using:

$$u_c(R_{47}) = \left[ (4 \times R_{17}^2 + 8 \times R_{13} \times R_{17} + 4 \times R_{13}^2) \times u_{\text{total}}^2(R_{18}) + (4 \times R_{18}^2 + 8 \times R_{13} \times R_{17} \times R_{18} + 4 \times R_{13}^2 \times R_{17}^2) \times u_c^2(R_{17}) + (4 \times R_{18}^2 + 4 \times R_{17}^2 \times R_{18} + R_{17}^4) \times u_c^2(R_{13}) \right]^{0.5} \quad (11)$$

### 3 Calculation of theoretical ratios

For the calculation of the theoretical ratios ratios of blend AB ( $R_{45,AB}^{neq}$ ,  $R_{45,AB}^{neq}$ ,  $R_{45,AB}^{eq}$ ,  $R_{46,AB}^{eq}$ ), the following equations are necessary. In table S 1, all quantities occurring in the following equations are defined.

$$R_{45,bk}^{neq} = \frac{(x_{44,X} \times n_X \times R_{45,pi} + x_{44,pj} \times n_Y \times R_{45,Y})}{(x_{44,X} \times n_X + x_{44,Y} \times n_Y)} \quad (12)$$

$$x_{44,X} = x_X(^{12}\text{C}) \times x_X(^{16}\text{O}) \times x_X(^{16}\text{O}) \quad (13)$$

$$n_X = m_X/M_X \quad (14)$$

$$M_X = M(^{12}\text{C}) \times x_X(^{12}\text{C}) + M(^{13}\text{C}) \times x_X(^{13}\text{C}) + 2 \times (M(^{16}\text{O}) \times x_X(^{16}\text{O}) + M(^{17}\text{O}) \times x_X(^{17}\text{O}) + M(^{18}\text{O}) \times x_X(^{18}\text{O})) \quad (15)$$

$$R_{45,X} = \frac{x_X(^{13}\text{C})}{1 - x_X(^{13}\text{C})} + 2 \times \frac{x_X(^{17}\text{O})}{1 - x_X(^{17}\text{O}) - x_X(^{18}\text{O})} \quad (16)$$

$$R_{46,bk}^{neq} = \frac{(x_{44,X} \times n_X \times R_{46,pi} + x_{44,pj} \times n_{pj} \times R_{46,pj})}{(x_{44,pi} \times n_X + x_{44,pj} \times n_{pj})} \quad (17)$$

$$R_{46,pi} = 2 \times \frac{x_X(^{13}\text{C})}{1 - x_X(^{13}\text{C})} \times \frac{x_X(^{17}\text{O})}{1 - x_X(^{17}\text{O}) - x_X(^{18}\text{O})} + 2 \times \frac{x_X(^{12}\text{C})}{1 - x_X(^{13}\text{C})} \times \left( \frac{x_X(^{17}\text{O})}{1 - x_X(^{17}\text{O}) - x_X(^{18}\text{O})} \right)^2 \quad (18)$$

$$+ 2 \times \frac{x_X(^{13}\text{C})}{1 - x_X(^{13}\text{C})} \times \frac{x_X(^{16}\text{O})}{1 - x_X(^{17}\text{O}) - x_X(^{18}\text{O})} \times \frac{x_X(^{18}\text{O})}{1 - x_X(^{17}\text{O}) - x_X(^{18}\text{O})} \quad (19)$$

$$R_{45,bk}^{eq} = x_{bk}(^{13}\text{C}) + 2 \times x_{bk}(^{17}\text{O})$$

$$x_{bk}(^{13}\text{C}) = \frac{(x_X(^{12}\text{C}) \times n_X \times R_{13,pi} + x_{pj}(^{12}\text{C}) \times n_{pj} \times R_{13,pj})}{(x_X(^{12}\text{C}) \times n_X + x_{pj}(^{12}\text{C}) \times n_{pj})} \quad (20)$$

$$R_{13,pi} = \frac{x_X(^{13}\text{C})}{1 - x_X(^{13}\text{C})} \quad (21)$$

$$x_{bk}(^{17}\text{O}) = \frac{(x_X(^{16}\text{O}) \times n_X \times R_{17,pi} + x_{pj}(^{16}\text{O}) \times n_{pj} \times R_{17,pj})}{(x_X(^{16}\text{O}) \times n_X + x_{pj}(^{16}\text{O}) \times n_{pj})} \quad (22)$$

$$R_{17,pi} = \frac{x_X(^{17}\text{O})}{1 - x_X(^{17}\text{O}) - x_X(^{18}\text{O})} \quad (23)$$

$$R_{46,bk}^{eq} = 2 \times x_{bk}(^{13}\text{C}) \times x_{bk}(^{16}\text{O}) \times x_{bk}(^{17}\text{O}) + x_{bk}(^{12}\text{C}) \times x_{bk}(^{17}\text{O})^2 + 2 \times x_{bk}(^{12}\text{C}) \times x_{bk}(^{17}\text{O}) \times x_{bk}(^{18}\text{O}) \quad (24)$$

$$R_{18,pi} = \frac{x_X(^{18}\text{O})}{1 - x_X(^{17}\text{O}) - x_X(^{18}\text{O})} \quad (25)$$

**Table S 1** Definition of all quantities appearing in the above equations, in order of appearance.

| quantity                | definition                                                                                                                                                            |
|-------------------------|-----------------------------------------------------------------------------------------------------------------------------------------------------------------------|
| $R_{q,bk}^{\text{neq}}$ | isotopologue ratio $q/44$ , $q \in \{45, 46\}$ of blend $bk$ , without assuming a statistical isotope distribution                                                    |
| $n_X$                   | amount of substance of parent material $X$                                                                                                                            |
| $x_{44,X}$              | amount-of-substance fraction of $^{12}\text{C}^{16}\text{O}_2$ in parent material $X$                                                                                 |
| $m_X$                   | mass of parent material $X$                                                                                                                                           |
| $M_X$                   | molar mass of parent material $X$                                                                                                                                     |
| $M(q)$                  | molar mass of $q^{\text{th}}$ isotope, $q \in \{^{12}\text{C}, ^{13}\text{C}, ^{16}\text{O}, ^{17}\text{O}, ^{18}\text{O}\}$                                          |
| $x_X(q)$                | amount-of-substance fraction of $q^{\text{th}}$ isotope, $q \in \{^{12}\text{C}, ^{13}\text{C}, ^{16}\text{O}, ^{17}\text{O}, ^{18}\text{O}\}$ in parent material $X$ |
| $R_{q,X}^{\text{neq}}$  | isotopologue ratio $q/44$ , $q \in \{45, 46\}$ of parent material $X$ , without statistical isotope distribution                                                      |
| $x_{bk}(q)$             | amount-of-substance fraction of $q^{\text{th}}$ isotope, $q \in \{^{12}\text{C}, ^{13}\text{C}, ^{16}\text{O}, ^{17}\text{O}, ^{18}\text{O}\}$ in blend $bk$          |
| $R_{q,bk}^{\text{eq}}$  | isotopologue ratio $q/44$ , $q \in \{45, 46\}$ of blend $bk$ , with assuming a statistical isotope distribution                                                       |

## 4 Gas mixing device

For preparing binary mixtures a gas mixing device was set up at PTB. The device is built from CF flanges (DN 16 CF). The device is depicted in figure S 2 and a schematic description is also given. The gas mixing device is equipped with a turbo pumping station, consisting of a HiPace 80 and MVP 015-2, both from Pfeiffer Vacuum GmbH, Asslar Germany. With this set up a pressure of roughly  $1 \times 10^{-7}$  mbar can be reached. The pressure in the piping is measured with a Pirani/cold cathode gauge from Pfeiffer (part number PT R26 252) and the gas pressure for filling the process is measured with a capacitance gauges also from Pfeiffer (PT R24 602). The gas mixing device is equipped with a second membrane pump (Pfeiffer, PK T05 065), which can be used to evacuate the piping to roughly  $1 \times 10^{-1}$  mbar, this by-pass pump is very convenient for evacuating the piping without rebooting the turbo pump. Additionally, the system is equipped with an argon flush unit (valve v9), the hole piping can be flush with argon (purity 0.999990 LL<sup>-1</sup>). The symmetrical set-up allows to prepare binary mixtures and avoid cross contaminations. The valves v1 and v2 are inline valves (Pfeiffer, DVC 016 SX), v3 to v8 are all metal angle valves (Pfeiffer, UVH 016 CU) and v9 and v10 are diaphragm valves (VACOM GmbH, Großlöbichau, Germany, part number 15DVM-16KF-VV-A ). The hole mixing device has been heated before each filling using heating taps,  $T \approx 60^\circ\text{C}$ , for roughly 12 h. The actual mixing procedure is summarized in figure S 3.

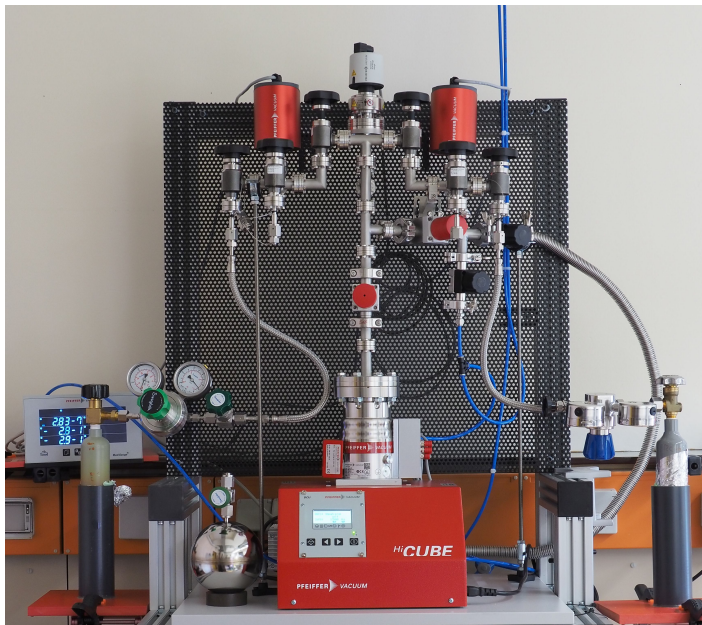

(a) Photography of gas mixing device at PTB.

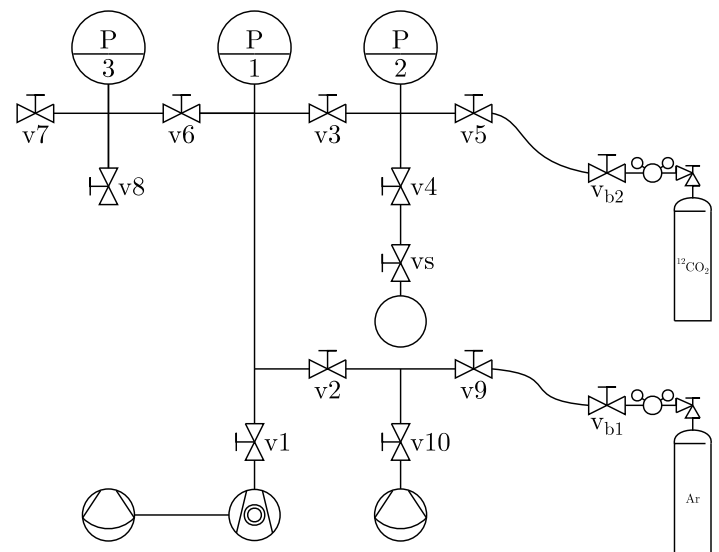

(b) Representation of gas mixing device at PTB.

**Fig. S 2** Photography and schematic representation of gas mixing device at PTB.

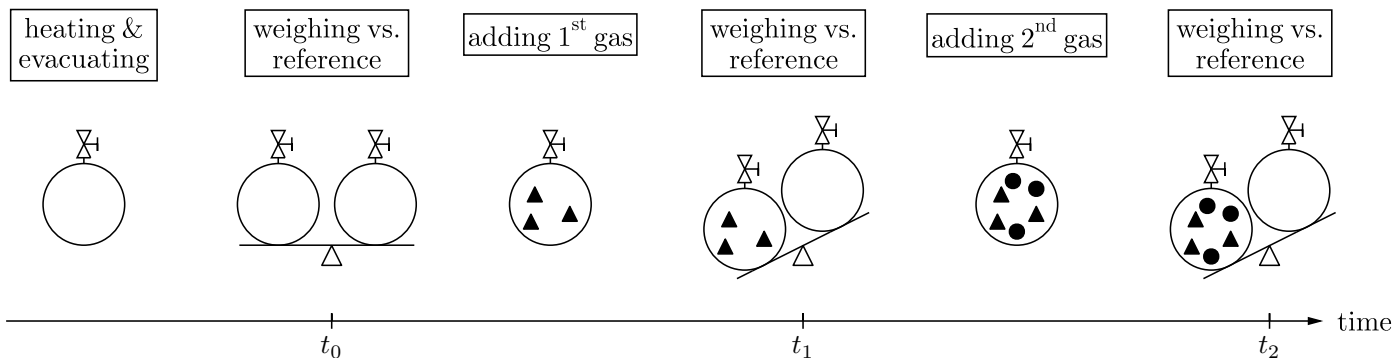

**Fig. S 3** Schematic representation of the preparation of the binary blends. Please note that the weighing here is depicted using a double pan balance, whereas in this study, a single pan balance was used. At times  $t_0$ ,  $t_1$  and  $t_2$ , the target sphere is weighed against the same evacuated reference sphere.

## 5 Measurement of natural CO<sub>2</sub>

As mentioned the main text, we also measured CO<sub>2</sub> with a natural isotopic composition ( $\delta_{\text{VPDB}}^{13\text{C}} = (-17.526 \pm 0.016) \text{‰}$  and  $\delta_{\text{VPDB-CO}_2}^{18\text{O}} = (-10.118 \pm 0.019) \text{‰}$ , with  $k = 1$  in both cases). Previous to the measurement we heated the gas, which was filled into one of our gas spheres. The heating temperature  $\vartheta$  was roughly 1800 °C and the gas was heated for 30 min. The logarithm of  $R_{45}^m$  (top) and  $R_{46}^m$  (bottom) over time are shown in figure S 4.

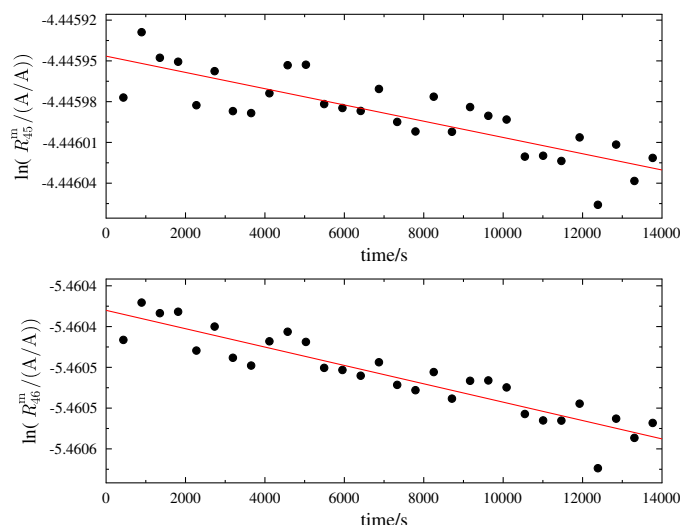

**Fig. S 4** Logarithm of  $R_{45}^m$  (top) and  $R_{46}^m$  (bottom) over time. The red lines indicate linear regression fits. Previous to the measurement the gas has been heated for 30 min at 1800 °C.

## 6 ISL code for deriving time zero $t_0$

For extrapolating to time zero  $t_0$ , the starting time (when the corresponding valve opens and the gas flows from the bellows into the ionization chamber) needs to be defined. The following code is written Isodat Script Language (ISL) and therefore only works on Thermo Fisher gas mass spectrometers (e.g. MAT253). This script opens valve v15 (see figure 5) and records the time. The time is logged into a txt file. Before the valve is opened, Isodat will ask where this file should be saved. The script must be run as a prescript and works on Isodat 3.0, it has not been tested on any other version of Isodat. By change `'_Set("Dual Inlet System/Valve 15",1)'` in line 25 to `'_Set("Dual Inlet System/Valve 25",1)'` the right bellows can be used. After the valve has been opened and an idle time of 10s the measurement starts normally. The idle time allows the gas flow to settle and can be adjusted if necessary.

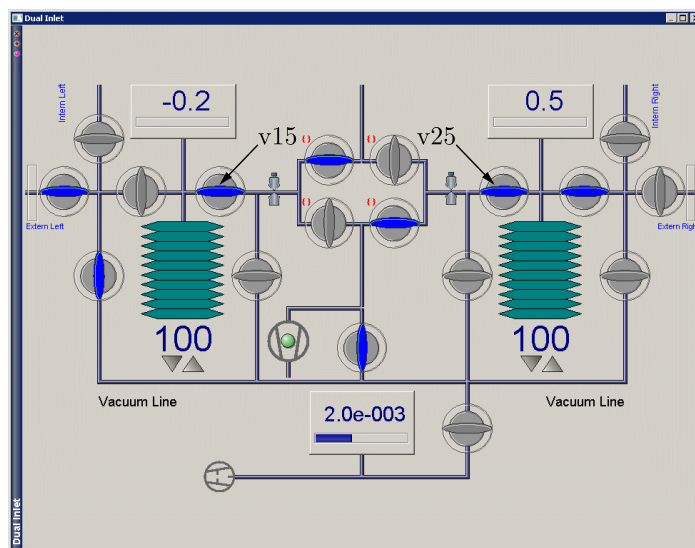

**Fig. S 5** Dual inlet system of a MAT 253 from Thermo Fisher, Bremen, Germany. v15 and v25 connect the corresponding gas reservoir with the changeover valve system. For extrapolating to time  $t_0$  the absolute time when the corresponding valve is opened is needed.

**Listing S 1** ISL source code of function to extrapolate to time  $t_0$  and calculate the responding ratios and their associated uncertainties.

```

1 //-----
2 //           Date 20-11-18
3
4 include "lib/stdisl.isl"
5 include "lib/instrument.isl"
6 include "lib/DualInlet_lib.isl"
7 main()
8 {
9   call InitScript();
10
11 //defining txt file for writing starting time
12 string csFileName;
13 string date;
14 bool bDoStore =FALSE;
15 bool bOk=FALSE;
16 date=_GetDate();
17
18 //the file location may needs to be adjusted
19 csFileName="C:\Thermo\Isodat NT\Global\User\Dual Inlet
20 System\Results\starting-time-t0";
21 csFileName += date;
22 bDoStore=_FileSelect(FALSE,"*.txt",csFileName);
23
24 //Opening Valve 15
25 string t0 = _GetTime();
26 _UserInfo(t0,0,00);
27 Set("Dual Inlet System/Valve 15",1);
28
29 //delay of 10 sec for gas flow to settle
30 _Delay(10000);
31 if (bDoStore)
32 {
33   bOk=_Write(csFileName, "Start time","Start time %",t0);
34 }
35 }
36 //-----

```

## 7 VBA code for extrapolation to $t_0$

In this section a VBA code (Visual Basics for Applications) for EXCEL<sup>®</sup> is presented. This code allows to perform the linear extrapolation of  $\ln(R_{45}^m)$  and  $\ln(R_{46}^m)$  to time zero. The input for this function are three ranges: The time, the logarithm of  $R_{45}^m$  and  $R_{46}^m$ . The function returns  $R_{45,0}^m$  and its associated uncertainty ( $k = 2!$ ) and  $R_{46,0}^m$  and its associated uncertainty ( $k = 2!$ ). Additionally, the isotope ratios  $R_{13}$ ,  $R_{17}$  and  $R_{18}$  derived from the extrapolated values of  $R_{45,0}^m$  and  $R_{46,0}^m$ . Also the expanded uncertainties of the isotope ratios are returned,  $k = 2$ . For the calculation of  $R_{18}$  the SSH algorithm<sup>4</sup> (named after Santrock, Studley and Hayes) is solved using the so-called *regula falsi*, the VBA codes of both are also given here. Please note that for the SSH algorithm it is necessary to choose  $K$  and  $\lambda$ . If necessary, the values of these two quantities

can be changed by the user. The values used in our codes were taken from Brand et al<sup>5</sup>.

**Listing S 2** VBA source code of function to extrapolate to time  $t_0$  and calculate the responding ratios and their associated uncertainties.

```
1 Public Function co2_all_in_one(lnR45 As Range, lnR46 As Range, rel_time As Range) As Variant()
2
3     Dim K As Variant
4     Dim lambda As Variant
5     Dim R45_0 As Variant
6     Dim R46_0 As Variant
7     Dim R18_rf As Variant
8     Dim delta As Variant
9     Dim R_17 As Variant
10    Dim R_13 As Variant
11    Dim z() As Variant
12    Dim y() As Variant
13    Dim ur_45 As Variant
14    Dim ur_46 As Variant
15    Dim ur_18 As Variant
16    Dim ur_17 As Variant
17    Dim ur_13 As Variant
18    Dim results() As Variant
19    ReDim results(1 To 5, 1 To 3)
20
21    lambda = 0.528
22    K = 0.01022461
23
24    z() = WorksheetFunction.LinEst(lnR45, rel_time, 1, 1)
25    y() = WorksheetFunction.LinEst(lnR46, rel_time, 1, 1)
26
27    R45_0 = Exp(z(1, 2))
28
29    R46_0 = Exp(y(1, 2))
30
31    uR_45 = Exp(z(1, 2)) * z(2, 2)
32
33    uR_46 = Exp(y(1, 2)) * y(2, 2)
34
35    R18_rf = regula_falsi_R18(R45_0, R46_0)
36
37    delta = ssh(R45_0, R46_0, R18_rf)
38
39    ur_18 = ur18(R18_rf, R45_0, R46_0, ur_45, ur_46, delta)
40
41    R_17 = K * R18_rf ^ lambda
42
43    R_13 = R45_0 - 2 * r_17
44
45    ur_17 = K * ur_18 * R18_rf ^ (lambda - 1) * lambda
46
47    ur_13 = (ur_45 ^ 2 + 4 * K ^ 2 * lambda ^ 2 * R18_rf ^ (2 * lambda - 2) _
48            * ur_18 ^ 2) ^ 0.5
49
50    results(1,1) = "R_{45,0}"
51    results(2,1) = "R_{46,0}"
52    results(3,1) = "R_{13}"
53    results(4,1) = "R_{17}"
54    results(5,1) = "R_{18}"
55    results(1, 2) = R45_0
56    results(1, 3) = ur_45 * 2
57    results(2, 2) = R46_0
58    results(2, 3) = ur_46 * 2
59    results(3, 2) = R_13
60    results(3, 3) = ur_13 * 2
61    results(4, 2) = R_17
62    results(4, 3) = ur_17 * 2
63    results(5, 2) = R18_rf
64    results(5, 3) = ur_18 * 2
65
66    co2_all_in_one = results()
67
68 End Function
```



**Listing S 3** VBA source code of *regula falsi* to calculate to  $R_{18}$ .

```
1 Function regula_falsi_R18(r_45 As Variant, r_46 As Variant) As Variant
2
3     Dim a As Variant
4     Dim b As Variant
5     Dim z As Variant
6     Dim counter As Integer
7     Dim fa As Variant
8     Dim fb As Variant
9     Dim fz As Variant
10
11     a = 100
12     b = 0
13
14     lambda = 0.528
15     K = 0.01022461
16
17     fa = ssh(r_45, r_46, a)
18     fb = ssh(r_45, r_46, b)
19
20     z = a - (b - a) / (fb - fa) * fa
21     fz = ssh(r_45, r_46, z)
22
23     While Abs(fz) <> 0
24
25         If (Sgn(fa) = Sgn(fz)) Then
26             a = z
27             b = b
28             Debug.Print ("Sgn(fa) = Sgn(fz)")
29         ElseIf (Sgn(fb) = Sgn(fz)) Then
30             b = z
31             a = a
32         Else
33             Debug.Print ("Warning, fa and fb have the same sign!")
34         End If
35
36         z = a - ((b - a) / (fb - fa)) * fa
37         fz = ssh(r_45, r_46, z)
38         fa = ssh(r_45, r_46, a)
39         fb = ssh(r_45, r_46, b)
40         counter = counter + 1
41
42         If counter > 10000 Then
43             fz = 0
44         End If
45
46     Wend
47
48     regula_falsi_R18 = z
49
50 End Function
```

**Listing S 4** VBA source code of the SSH algorithm.

```
1 Function ssh(r_45 As Variant, r_46 As Variant, r_18 As Variant) As Variant
2
3     Dim K As Variant
4     Dim lambda As Variant
5
6     lambda = 0.5278
7     K = 0.01022461
8
9     ssh = -r_46 - 3 * K ^ 2 * r_18 ^ (2 * lambda) + 2 * K * r_45 * r_18 ^ lambda + 2 * r_18
10
11 End Function
```

**Listing S 5** VBA function for calculating  $u_c(R_{18})$ .

```

1 Function url8(r_18 As Variant, r_45 As Variant, r_46 As Variant, ur_45 _
2           As Variant, ur_46 As Variant, epsilon As Variant) As Variant
3
4
5   Dim lambda As Variant
6   Dim K As Variant
7
8   lambda = 0.528
9   K = 0.01022461
10
11  url8 = ((ur_46 ^ 2 - (2 * K * r_18 ^ lambda) ^ 2 * ur_45 ^ 2) / _
12          (2 * K * r_18 ^ (lambda - 1) * r_45 * lambda - 6 * K ^ 2 * r_18 ^ (2 * _ lambda - 1) * lambda + 2) ^ 2 + epsilon ^ 2) ^ 0.5
13
14 End Function

```

## 8 Alternative equations

In main text of this publication, it has been shown how a system of non-linear equation based on the ratios  $R_{45}$ ,  $R_{46}$  and  $R_{47}$  can be set-up and solved for the absolute ratios and the  $K$ -factors. Depending on the isotopic composition of the starting materials it is also possible to measure other intensity ratios and consequently for calculating the absolute isotope ratios and the  $K$ -factors a different set of equations is needed. The solving routine is the same and must be adapted accordingly. Please note that three ion intensity ratios must be measured, so that enough information is available and the system of equations can be solved. Equations 26a to 26e describe the measured ion intensity ratios of the two parent materials and the binary blend,  $y$  stands for A, B or AB.

$$0 = K_{45} \times R_{45,y}^m - (R_{13,y} + 2 \times R_{17,y}) \quad (26a)$$

$$0 = K_{46} \times R_{46,y}^m - (2 \times R_{18,y} + 2 \times R_{17,y} \times R_{13,y} + R_{17,y}^2) \quad (26b)$$

$$0 = K_{47} \times R_{47,y}^m - (2 \times R_{18,y} \times R_{17,y} + 2 \times R_{18,y} \times R_{13,y} + R_{17,y}^2 \times R_{13,y}) \quad (26c)$$

$$0 = K_{48} \times R_{48,y}^m - (2 \times R_{13,y} + R_{18,y}^2) \quad (26d)$$

$$0 = K_{49} \times R_{49,y}^m - (R_{13,y} \times R_{18,y}^2) \quad (26e)$$

In order to reduce the number of unknowns, the absolute isotope ratios of the binary blend AB must be expressed as linear combinations of the corresponding ratios of the two parent materials. This is shown in equations 27a to 27c.

$$R_{13,AB} = \frac{(n_A \times x_{12,A} \times R_{13,A} + n_B \times x_{12,B} \times R_{13,B})}{(n_A \times x_{12,A} + n_B \times x_{12,B})} \quad (27a)$$

$$R_{17,AB} = \frac{(n_A \times x_{16,A} \times R_{17,A} + n_B \times x_{16,B} \times R_{17,B})}{(n_A \times x_{16,A} + n_B \times x_{16,B})} \quad (27b)$$

$$R_{18,AB} = \frac{(n_A \times x_{16,A} \times R_{18,A} + n_B \times x_{16,B} \times R_{18,B})}{(n_A \times x_{16,A} + n_B \times x_{16,B})} \quad (27c)$$

The amounts of substance can be expressed as:

$$n_y = m_y / M_y \quad (28)$$

Whereas  $y$  stands for A or B. The molar mass of the corresponding material can be expressed as:

$$M_y = M(^{12}\text{C}) \times x_y(^{12}\text{C}) + M(^{13}\text{C}) \times x_y(^{13}\text{C}) + 2 \times (M(^{16}\text{O}) \times x_y(^{16}\text{O}) + M(^{17}\text{O}) \times x_y(^{17}\text{O}) + M(^{18}\text{O}) \times x_y(^{18}\text{O})) \quad (29)$$

The occurring amount-of-substance fractions must be expressed in terms of the isotope ratios:

$$x_{12,y} = 1 / (1 + R_{13,y}) \quad (30a)$$

$$x_{13,y} = R_{13,y} / (1 + R_{13,y}) \quad (30b)$$

$$x_{16,y} = 1 / (1 + R_{17,y} + R_{18,y}) \quad (30c)$$

$$x_{17,y} = R_{17,y} / (1 + R_{17,y} + R_{18,y}) \quad (30d)$$

$$x_{18,y} = R_{18,y} / (1 + R_{17,y} + R_{18,y}) \quad (30e)$$

Taking all these relations into account equations like the ones already shown in the main text can be set-up. In the second Mathematica notebook ('equation-system.nb') accompanying this publication all possible initial equations are give.

## 9 Supplement to the Simulation

In the main text, we described a simulation, where we calculated the absolute isotope ratios, the  $K$ -factors, and all associated uncertainties of the two parent materials via a Monte Carlo simulation. The input is listed in Table S2. The results of our code are the density probability functions (PDF) of the above listed quantities, see figure S6. From those PDFs the best estimates and the uncertainties associated with them are derived. The PDFs are assumed to be normal distributions, therefore the uncertainty  $u$  is  $\sigma$  and the best estimate is  $\mu$ . The number of Monte Carlo trials was to  $1 \times 10^5$ .

**Table S 2** Input of the second simulation with made-up numbers of the two parent materials (A', B') and the binary blend AB'. Note that the uncertainties ( $k = 1$ ) (of the measured ratios and the masses), on the other hand, stem from real measurements in order to assess the performance of the method. The isotopologue ratios were calculated from the isotope ratios and transformed into the intensity ratios by dividing them with the corresponding  $K$ -factors, which are also given in table .

|                           | A'               | B'           | AB'            |
|---------------------------|------------------|--------------|----------------|
| $R_{45,y}^m / (A A^{-1})$ | 0.012 148 8(14)  | 83.5958(60)  | 1.040411(10)   |
| $R_{46,y}^m / (A A^{-1})$ | 0.004961 380(74) | 1.948 05(40) | 0.030691 8(31) |
| $R_{47,y}^m / (A A^{-1})$ | 0.000057939(12)  | 2.740 52(90) | 0.019227 1(40) |
| $m_x / g$                 | 0.994 70(19)     | 1.0023(19)   | –              |

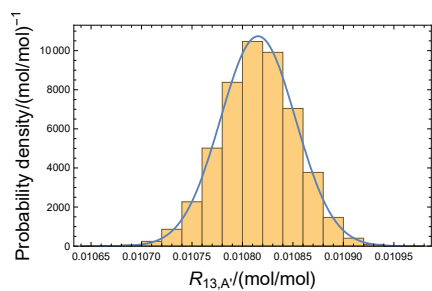

(a) PDF and histogram of  $R_{13,A'}$ .

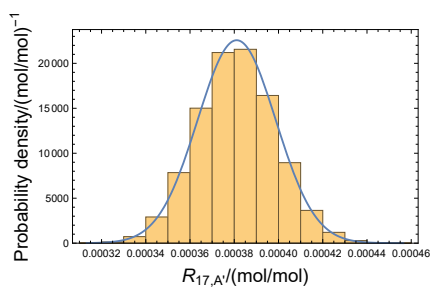

(b) PDF and histogram of  $R_{17,A'}$ .

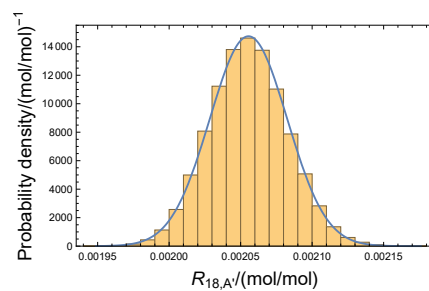

(c) PDF and histogram of  $R_{18,A'}$ .

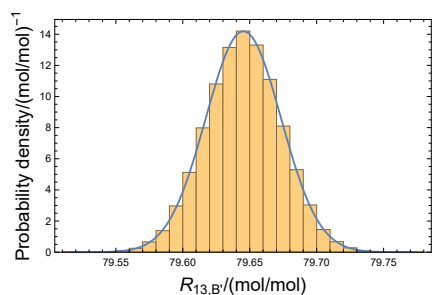

(d) PDF and histogram of  $R_{13,B'}$ .

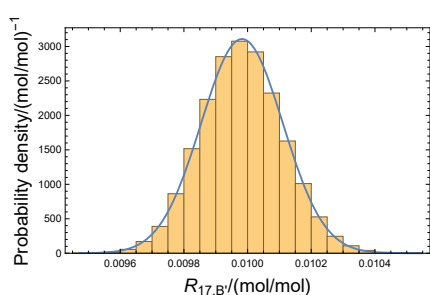

(e) PDF and histogram of  $R_{17,B'}$ .

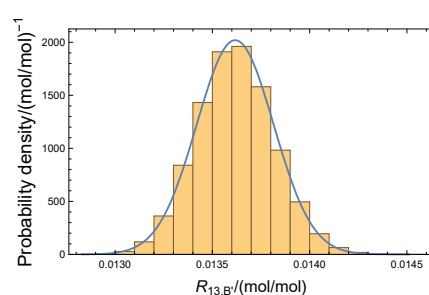

(f) PDF and histogram of  $R_{18,B'}$ .

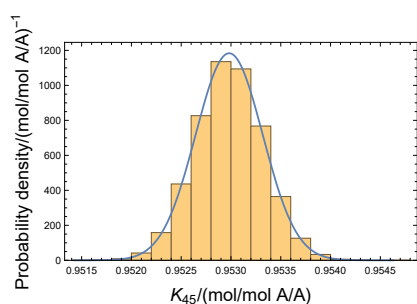

(g) PDF and histogram of  $K_{45}$ .

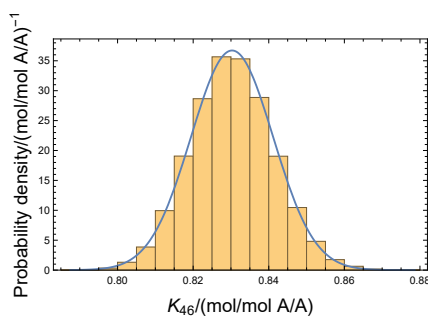

(h) PDF and histogram of  $K_{46}$ .

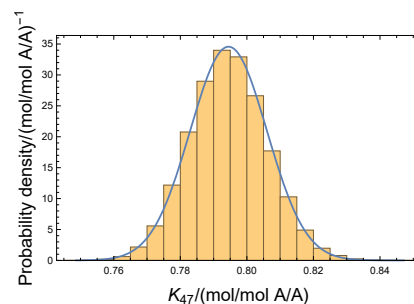

(i) PDF and histogram of  $K_{47}$ .

**Fig. S 6** Probability density functions (blue lines, Gaussian functions) and histograms obtained by Monte Carlo simulation. The number of Monte Carlo trials was set to  $1 \times 10^5$ .

## 10 Code for solving the system of non-linear equations

In the main text it is described how  $K$ -factors for  $\text{CO}_2$  can be calculated when the isotopic equilibrium is considered. Since we presented a Mathematica file to solve the non-linear equation system, we also like to share the code for all other users who do not use Mathematica but like to implement our code in a different way. Please note, the system of non-linear equations is not directly shown in the code, since they are excessively long. The non-linear equation system, the equations for calculating the initial guesses, and the function for generating normally distributed deviates were imported from the file titled 'equations-r45-r46-r47.m'. Therefore, these two files must be saved in the same directory. The functions in this file are all given in the main text. The data evaluation is also imported from a file ('data-evaluation.m', see listing 7). This file must also be saved in the same directory.

**Listing S 6** Mathematica code for solving the system of non-linear equations.

```
1 SetDirectory[NotebookDirectory[]];
2 Import["equations-r45-r46-r47.m"];
3 Import["data-evaluation.m"];
4 (*****
5 (* input *)
6
7 (* nr is the number of Monte Carlo trials *)
8 nr = 1000000;
9
10 (* Atomic mass of the five stable isotopes *)
11 M12C = 12;
12 muM13C = 13.00335483521;
13 muM16O = 15.9949146196;
14 muM17O = 16.9991317566;
15 muM18O = 17.9991596128;
16
17 (* uncertainties (k=1) associated with the atomic mass of the five \
18 stable isotopes *)
19 uM13C = 2.3*^-10;
20 uM16O = 1.7*^-10;
21 uM17O = 7*^-10;
22 uM18O = 7*^-10;
23
24 (* masses of the parent materials A and B *)
25 mumA = 0.9947;
26 mumB = 1.0023;
27
28 (* uncertainties (k=1) associated with the masses of the parent \
29 materials A and B *)
30 umA = 1.9*^-4;
31 umB = 1.9*^-4;
32
33 (* measured ion intensities of material A *)
34 mur45A = 0.0121488105002256;
35 mur46A = 0.00496138026894439;
36 mur47A = 0.0000579385118709506;
37
38 (* uncertainties (k=1) associated with the measured ion intensities of \
39 material A *)
40 ur45A = 0.00000139711320752594;
41 ur46A = 0.0000000744207040341659;
42 ur47A = 0.0000000121670874928996;
43
44 (* measured ion intensities of material B *)
45 mur45B = 83.5957511985939;
46 mur46B = 1.94805231823881;
47 mur47B = 2.74051699405287;
48
49 (* uncertainties (k=1) associated with the measured ion intensities of \
50 material B *)
51 ur45B = 0.006018894;
52 ur46B = 0.00038961;
53 ur47B = 0.000904371;
54
55 (* measured ion intensities of blend AB *)
56 mur45AB = 1.04041111720587;
57 mur46AB = 0.0306918329606498;
58 mur47AB = 0.0192271177872782;
59
60 (* uncertainties (k=1) associated with the measured ion intensities of \
61 material AB *)
62 ur45AB = 0.0000100919878368969;
63 ur46AB = 0.00000306918329606498;
64 ur47AB = 0.00000403769473532842;
65 (* ***** *)
66
67 (* list for storing the results and later data evaluation *)
68 listK45 = Table[Null, nr];
69 listK46 = Table[Null, nr];
70 listK47 = Table[Null, nr];
71 listR13A = Table[Null, nr];
72 listR17A = Table[Null, nr];
73 listR18A = Table[Null, nr];
74 listR13B = Table[Null, nr];
75 listR17B = Table[Null, nr];
76 listR18B = Table[Null, nr];
77 (*****
```

```

78
79 (*****
80 (* Monte Carlo trials *)
81 For[i = 1, i <= nr, i++,
82
83   (* generating random deviates *)
84   M13C = muM13C + boxmuller[uM13C, RandomReal[], RandomReal[]];
85   M160 = muM160 + boxmuller[uM160, RandomReal[], RandomReal[]];
86   M170 = muM170 + boxmuller[uM170, RandomReal[], RandomReal[]];
87   M180 = muM180 + boxmuller[uM180, RandomReal[], RandomReal[]];
88   mA = mumA + boxmuller[uma, RandomReal[], RandomReal[]];
89   mB = mumB + boxmuller[umB, RandomReal[], RandomReal[]];
90   r45A = mur45A + boxmuller[ur45A, RandomReal[], RandomReal[]];
91   r46A = mur46A + boxmuller[ur46A, RandomReal[], RandomReal[]];
92   r47A = mur47A + boxmuller[ur47A, RandomReal[], RandomReal[]];
93   r45B = mur45B + boxmuller[ur45B, RandomReal[], RandomReal[]];
94   r46B = mur46B + boxmuller[ur46B, RandomReal[], RandomReal[]];
95   r47B = mur47B + boxmuller[ur47B, RandomReal[], RandomReal[]];
96   r45AB = mur45AB + boxmuller[ur45AB, RandomReal[], RandomReal[]];
97   r46AB = mur46AB + boxmuller[ur46AB, RandomReal[], RandomReal[]];
98   r47AB = mur47AB + boxmuller[ur47AB, RandomReal[], RandomReal[]];
99
100  (* calculating initial values of material A *)
101  intR17A = FindRoot[InitialR17[r45A, r46A, r47A, x], {x, 0}];
102  intR17A = x /. intR17A[[1]];
103  intR18A = (r46A - 2*intR17A*r45A + 3*intR17A^2)/2;
104  intR13A = r45A - 2*intR17A;
105
106  (* calculating initial values of material B *)
107  intR17B = FindRoot[InitialR17[r45B, r46B, r47B, x], {x, 0}];
108  intR17B = x /. intR17B[[1]];
109  intR18B = (r46A - 2*intR17B*r45A + 3*intR17B^2)/2;
110  intR13B = r45B - 2*intR17B;
111
112  (* solving the system of non-linear equations *)
113  results =
114  FindRoot[{f1, f2, f3, f4, f5, f6, f7, f8,
115           f9}, {{K45, 1}, {K46, 1}, {K47, 1}, {R13A, intR13A}, {R17A,
116           intR17A}, {R18A, intR18A}, {R13B, intR13B}, {R17B,
117           intR17B}, {R18B, intR18B}}, MaxIterations -> \[Infinity]];
118
119  (* storing results for later data evaluation in lists *)
120  listK45[[i]] = K45 /. results[[1]];
121  listK46[[i]] = K46 /. results[[2]];
122  listK47[[i]] = K47 /. results[[3]];
123  listR13A[[i]] = R13A /. results[[4]];
124  listR17A[[i]] = R17A /. results[[5]];
125  listR18A[[i]] = R18A /. results[[6]];
126  listR13B[[i]] = R13B /. results[[7]];
127  listR17B[[i]] = R17B /. results[[8]];
128  listR18B[[i]] = R18B /. results[[9]];
129 ]
130 (*****
131
132 (*****
133 (* data evaluation, calculating of the best estimate and the \
134 associated uncertainty *)
135
136 (* data evaluation for Subscript[R, 13,A] *)
137 dataevaluation[listR13A, "\[!\(\*SubscriptBox[
138   StyleBox[\"R\", \nFontSlant->\\"Italic\", \ (13, A)]\)", " mol/mol"];
139 result1 = %;
140
141 (* data evaluation for Subscript[R, 17,A] *)
142 dataevaluation[listR17A, "\[!\(\*SubscriptBox[
143   StyleBox[\"R\", \nFontSlant->\\"Italic\", \ (17, A)]\)", " mol/mol"];
144 result2 = %;
145
146 (* data evaluation for Subscript[R, 18,A] *)
147 dataevaluation[listR18A, "\[!\(\*SubscriptBox[
148   StyleBox[\"R\", \nFontSlant->\\"Italic\", \ (18, A)]\)", " mol/mol"];
149 result3 = %;
150
151 (* data evaluation for Subscript[R, 13,B] *)
152 dataevaluation[listR13B, "\[!\(\*SubscriptBox[
153   StyleBox[\"R\", \nFontSlant->\\"Italic\", \ (13, B)]\)", " mol/mol"];
154 result4 = %;
155
156 (* data evaluation for Subscript[R, 17,B] *)
157 dataevaluation[listR17B, "\[!\(\*SubscriptBox[
158   StyleBox[\"R\", \nFontSlant->\\"Italic\", \ (17, B)]\)", " mol/mol"];
159 result5 = %;
160
161 (* data evaluation for Subscript[R, 18,B] *)
162 dataevaluation[listR18B, "\[!\(\*SubscriptBox[
163   StyleBox[\"R\", \nFontSlant->\\"Italic\", \ (18, B)]\)", " mol/mol"];
164 result6 = %;
165
166 (* data evaluation for Subscript[K, 45] *)
167 dataevaluation[listK45, "\[!\(\*SubscriptBox[
168   StyleBox[\"K\", \nFontSlant->\\"Italic\", \ (45)]\)", " mol/mol/A/A"];
169 result7 = %;
170
171 (* data evaluation for Subscript[K, 47] *)
172 dataevaluation[listK46, "\[!\(\*SubscriptBox[
173   StyleBox[\"K\", \nFontSlant->\\"Italic\", \ (46)]\)", " mol/mol/A/A"];
174 result8 = %;

```

```

175
176 (* data evaluation for Subscript[K, 47] *)
177 dataevaluation[listK46, "\!\(\*\*SubscriptBox[
178   StyleBox[\\"K\", \nFontSlant->\\"Italic\", \ (47)\]\)", " mol/mol/A/A"];
179 result9 = %;
180
181 (*****
182
183 (*****
184 (* printing result file, which contains all best estimates and their \
185 associated uncertainties *)
186
187   filename =
188   "results-file-co2-calculator-" <>
189   DateString[{"Year", "-", "Month", "-", "Day", "-", "Hour", "-",
190     "Minute"}] <> ".txt";
191 nrstring = "Number of Monte Carlo trials was set to " <> ToString[nr];
192 PutAppend[nrstring, result1, result2, result3, result4, result5,
193   result6, result7, result8, result9, filename];
194 (* ***** *)

```

**Listing S 7** Mathematica code the data evaluation.

```

1 dataevaluation[datalist_, name_, unit_] :=
2 (dist = EstimatedDistribution[datalist, NormalDistribution[\[Mu],
3   \[Sigma]]]; mu = dist[[1]]; sigma = dist[[2]]; pdfs = PDF[dist, x];
4
5 ylable = StringJoin["Prpabilitydensity/(", unit,
6   "\!\(\*\*SuperscriptBox[\ ( ) \ , \ (-1)\]\)");
7
8 xlable = StringJoin[name, "/(", unit, ")"];
9
10 Print[Show[{Histogram[datalist, Automatic, "PDF",
11   Frame -> {True, True, True, True}, FrameLabel ->
12     {Style[xlable, 16], Style[ylable, 16]}],
13   Plot[pdfs, {x, Min[datalist], Max[datalist]}]}]];
14
15 string = StringJoin["The best estimate of ", ToString[name], " is ",
16   ToString[mu], " ", unit, " "];
17
18 Print["The best estimate of", name,
19   "is ", mu, " and its associated uncertainty is ", sigma, " (",
20   (sigma/mu)*100, " %)."];
21
22 Return[string])

```

## Notes and references

- [1] G. Mana and O. Rienitz, *Int. J. Mass Spectrom.*, 2010, **291**, 55–60.
- [2] A. Stoll-Werian, L. Flierl, O. Rienitz, J. Noordmann, R. Kessel and A. Pramann, *Spectrochim. Acta B*, 2019, 76–83.
- [3] L. Flierl, A. Pramann, J. Noordmann, A. Röthke and O. Rienitz, *Spectrochimica Acta Part B: Atomic Spectroscopy*, 2020, **168**, 105866.
- [4] J. Santrock, S. A. Studley and J. M. Hayes, *Analytical Chemistry*, 1985, **57**, 1444–1448.
- [5] W. A. Brand, S. S. Assonov and T. B. Coplen, *Pure Appl. Chem.*, 2010, **82**, 1719–1733.
- [6] S. K. Gupta, *Numerical Methods for Engineers*, New Age International Limited Publishers, New Delhi, 2003.
- [7] Joint Committee for Guides in Metrology, *JCGM 100: Evaluation of Measurement Data - Guide to the Expression of Uncertainty in Measurement*, JCGM technical report, 2008.
